# Supplementary material
Source: publisher figshare collection journal article supplement (https://acs.figshare.com/ndownloader/files/4639165)
Supplement: Supplementary file 1 [file 4639165]

TITLE     Metal-free Oxytocin
AUTHOR    Liu, Wyttenbach, Bowers
REMARK    B3LYP/LACVP structure of [OT + H] cation
ATOM      1  N   CYS     1      12.358   8.972  -1.701  1.00  0.00 
ATOM      2  H1  CYS     1      13.115   8.627  -1.091  1.00  0.00 
ATOM      3  H2  CYS     1      11.538   8.321  -1.608  1.00  0.00 
ATOM      4  H3  CYS     1      12.090   9.911  -1.339  1.00  0.00 
ATOM      5  CA  CYS     1      12.757   9.162  -3.149  1.00  0.00 
ATOM      6  HA  CYS     1      11.846   9.539  -3.629  1.00  0.00 
ATOM      7  CB  CYS     1      13.827  10.252  -3.284  1.00  0.00 
ATOM      8  HB1 CYS     1      13.891  10.541  -4.338  1.00  0.00 
ATOM      9  HB2 CYS     1      13.563  11.124  -2.684  1.00  0.00 
ATOM     10  SG  CYS     1      15.632   9.756  -2.920  1.00  0.00 
ATOM     11  C   CYS     1      13.111   7.876  -3.897  1.00  0.00 
ATOM     12  O   CYS     1      13.113   7.915  -5.147  1.00  0.00 
ATOM     13  N   TYR     2      13.406   6.753  -3.181  1.00  0.00 
ATOM     14  HN  TYR     2      13.395   6.741  -2.159  1.00  0.00 
ATOM     15  CA  TYR     2      13.451   5.433  -3.853  1.00  0.00 
ATOM     16  HA  TYR     2      12.929   5.557  -4.804  1.00  0.00 
ATOM     17  CB  TYR     2      14.879   4.917  -4.198  1.00  0.00 
ATOM     18  HB1 TYR     2      14.749   3.995  -4.779  1.00  0.00 
ATOM     19  HB2 TYR     2      15.298   5.663  -4.884  1.00  0.00 
ATOM     20  CG  TYR     2      15.851   4.665  -3.062  1.00  0.00 
ATOM     21  CD1 TYR     2      16.170   3.355  -2.662  1.00  0.00 
ATOM     22  HD1 TYR     2      15.724   2.512  -3.181  1.00  0.00 
ATOM     23  CD2 TYR     2      16.471   5.732  -2.385  1.00  0.00 
ATOM     24  HD2 TYR     2      16.273   6.749  -2.702  1.00  0.00 
ATOM     25  CE1 TYR     2      17.047   3.116  -1.598  1.00  0.00 
ATOM     26  HE1 TYR     2      17.275   2.097  -1.298  1.00  0.00 
ATOM     27  CE2 TYR     2      17.337   5.511  -1.314  1.00  0.00 
ATOM     28  HE2 TYR     2      17.779   6.339  -0.777  1.00  0.00 
ATOM     29  CZ  TYR     2      17.613   4.201  -0.922  1.00  0.00 
ATOM     30  OH  TYR     2      18.452   4.020   0.194  1.00  0.00 
ATOM     31  HH  TYR     2      18.813   3.113   0.230  1.00  0.00 
ATOM     32  C   TYR     2      12.551   4.567  -2.965  1.00  0.00 
ATOM     33  O   TYR     2      11.343   4.375  -3.260  1.00  0.00 
ATOM     34  N   ILE     3      13.075   4.190  -1.764  1.00  0.00 
ATOM     35  HN  ILE     3      14.056   4.385  -1.596  1.00  0.00 
ATOM     36  CA  ILE     3      12.226   4.030  -0.583  1.00  0.00 
ATOM     37  HA  ILE     3      11.216   3.849  -0.963  1.00  0.00 
ATOM     38  CB  ILE     3      12.676   2.812   0.282  1.00  0.00 
ATOM     39  HB  ILE     3      12.825   2.011  -0.455  1.00  0.00 
ATOM     40  CG2 ILE     3      14.013   3.068   1.004  1.00  0.00 
ATOM     41  H21 ILE     3      14.339   2.158   1.518  1.00  0.00 
ATOM     42  H22 ILE     3      14.810   3.361   0.314  1.00  0.00 
ATOM     43  H23 ILE     3      13.912   3.860   1.755  1.00  0.00 
ATOM     44  CG1 ILE     3      11.608   2.305   1.285  1.00  0.00 
ATOM     45  H11 ILE     3      11.994   1.368   1.707  1.00  0.00 
ATOM     46  H12 ILE     3      11.538   2.991   2.142  1.00  0.00 
ATOM     47  CD  ILE     3      10.214   2.041   0.691  1.00  0.00 
ATOM     48  HD1 ILE     3       9.570   1.546   1.425  1.00  0.00 
ATOM     49  HD2 ILE     3       9.702   2.961   0.379  1.00  0.00 
ATOM     50  HD3 ILE     3      10.277   1.391  -0.189  1.00  0.00 
ATOM     51  C   ILE     3      12.235   5.390   0.144  1.00  0.00 
ATOM     52  O   ILE     3      12.994   6.327  -0.236  1.00  0.00 
ATOM     53  N   GLN     4      11.405   5.546   1.203  1.00  0.00 
ATOM     54  HN  GLN     4      10.815   4.779   1.499  1.00  0.00 
ATOM     55  CA  GLN     4      11.265   6.846   1.885  1.00  0.00 
ATOM     56  HA  GLN     4      11.687   7.584   1.198  1.00  0.00 
ATOM     57  CB  GLN     4       9.790   7.191   2.132  1.00  0.00 
ATOM     58  HB1 GLN     4       9.264   7.038   1.184  1.00  0.00 
ATOM     59  HB2 GLN     4       9.358   6.525   2.889  1.00  0.00 
ATOM     60  CG  GLN     4       9.642   8.672   2.576  1.00  0.00 
ATOM     61  HG1 GLN     4      10.001   8.764   3.605  1.00  0.00 
ATOM     62  HG2 GLN     4      10.282   9.287   1.939  1.00  0.00 
ATOM     63  CD  GLN     4       8.229   9.193   2.443  1.00  0.00 
ATOM     64  OE1 GLN     4       7.862   9.921   1.468  1.00  0.00 
ATOM     65  NE2 GLN     4       7.349   8.840   3.410  1.00  0.00 
ATOM     66  H21 GLN     4       6.392   9.162   3.353  1.00  0.00 
ATOM     67  H22 GLN     4       7.627   8.292   4.212  1.00  0.00 
ATOM     68  C   GLN     4      12.135   6.914   3.155  1.00  0.00 
ATOM     69  O   GLN     4      11.652   7.161   4.284  1.00  0.00 
ATOM     70  N   ASN     5      13.474   6.751   2.920  1.00  0.00 
ATOM     71  HN  ASN     5      13.792   6.609   1.964  1.00  0.00 
ATOM     72  CA  ASN     5      14.490   7.243   3.868  1.00  0.00 
ATOM     73  HA  ASN     5      14.006   7.305   4.845  1.00  0.00 
ATOM     74  CB  ASN     5      15.701   6.296   3.988  1.00  0.00 
ATOM     75  HB1 ASN     5      16.450   6.759   4.645  1.00  0.00 
ATOM     76  HB2 ASN     5      15.363   5.381   4.494  1.00  0.00 
ATOM     77  CG  ASN     5      16.360   5.891   2.673  1.00  0.00 
ATOM     78  OD1 ASN     5      15.914   6.285   1.554  1.00  0.00 
ATOM     79  ND2 ASN     5      17.426   5.066   2.751  1.00  0.00 
ATOM     80  H21 ASN     5      17.875   4.750   1.886  1.00  0.00 
ATOM     81  H22 ASN     5      17.797   4.759   3.639  1.00  0.00 
ATOM     82  C   ASN     5      14.797   8.711   3.494  1.00  0.00 
ATOM     83  O   ASN     5      14.533   9.649   4.280  1.00  0.00 
ATOM     84  N   CYS     6      15.238   8.934   2.217  1.00  0.00 
ATOM     85  HN  CYS     6      15.426   8.116   1.635  1.00  0.00 
ATOM     86  CA  CYS     6      15.062  10.253   1.624  1.00  0.00 
ATOM     87  HA  CYS     6      15.457  10.991   2.331  1.00  0.00 
ATOM     88  CB  CYS     6      15.855  10.390   0.312  1.00  0.00 
ATOM     89  HB1 CYS     6      16.926  10.414   0.518  1.00  0.00 
ATOM     90  HB2 CYS     6      15.567  11.285  -0.241  1.00  0.00 
ATOM     91  SG  CYS     6      15.558   8.886  -0.840  1.00  0.00 
ATOM     92  C   CYS     6      13.553  10.534   1.437  1.00  0.00 
ATOM     93  O   CYS     6      12.733   9.600   1.206  1.00  0.00 
ATOM     94  N   PRO     7      13.130  11.815   1.528  1.00  0.00 
ATOM     95  CA  PRO     7      11.691  12.122   1.424  1.00  0.00 
ATOM     96  HA  PRO     7      11.139  11.543   2.171  1.00  0.00 
ATOM     97  CD  PRO     7      13.961  13.030   1.749  1.00  0.00 
ATOM     98  HD1 PRO     7      14.246  13.102   2.806  1.00  0.00 
ATOM     99  HD2 PRO     7      14.868  13.002   1.141  1.00  0.00 
ATOM    100  CB  PRO     7      11.622  13.647   1.723  1.00  0.00 
ATOM    101  HB1 PRO     7      11.442  13.797   2.792  1.00  0.00 
ATOM    102  HB2 PRO     7      10.814  14.137   1.174  1.00  0.00 
ATOM    103  CG  PRO     7      13.019  14.170   1.330  1.00  0.00 
ATOM    104  HG1 PRO     7      13.268  15.114   1.820  1.00  0.00 
ATOM    105  HG2 PRO     7      13.076  14.320   0.246  1.00  0.00 
ATOM    106  C   PRO     7      11.152  11.776   0.032  1.00  0.00 
ATOM    107  O   PRO     7      11.926  11.660  -0.962  1.00  0.00 
ATOM    108  N   LEU     8       9.808  11.648  -0.057  1.00  0.00 
ATOM    109  HN  LEU     8       9.259  11.496   0.786  1.00  0.00 
ATOM    110  CA  LEU     8       9.031  11.625  -1.325  1.00  0.00 
ATOM    111  HA  LEU     8       8.001  11.805  -1.004  1.00  0.00 
ATOM    112  CB  LEU     8       9.456  12.736  -2.301  1.00  0.00 
ATOM    113  HB1 LEU     8       9.581  13.662  -1.722  1.00  0.00 
ATOM    114  HB2 LEU     8      10.429  12.477  -2.723  1.00  0.00 
ATOM    115  CG  LEU     8       8.456  12.999  -3.453  1.00  0.00 
ATOM    116  HG  LEU     8       8.277  12.046  -3.970  1.00  0.00 
ATOM    117  CD1 LEU     8       9.096  13.965  -4.469  1.00  0.00 
ATOM    118  H11 LEU     8       9.320  14.933  -4.002  1.00  0.00 
ATOM    119  H12 LEU     8      10.032  13.557  -4.867  1.00  0.00 
ATOM    120  H13 LEU     8       8.423  14.150  -5.313  1.00  0.00 
ATOM    121  C2  LEU     8       7.109  13.557  -2.955  1.00  0.00 
ATOM    122  H21 LEU     8       6.436  13.748  -3.798  1.00  0.00 
ATOM    123  H22 LEU     8       6.590  12.867  -2.278  1.00  0.00 
ATOM    124  H23 LEU     8       7.255  14.506  -2.424  1.00  0.00 
ATOM    125  C   LEU     8       9.049  10.232  -1.992  1.00  0.00 
ATOM    126  O   LEU     8       9.666   9.993  -3.061  1.00  0.00 
ATOM    127  N   GLY     9       8.284   9.284  -1.383  1.00  0.00 
ATOM    128  HN  GLY     9       7.946   9.448  -0.432  1.00  0.00 
ATOM    129  CA  GLY     9       8.013   8.019  -2.047  1.00  0.00 
ATOM    130  HA1 GLY     9       7.582   8.214  -3.036  1.00  0.00 
ATOM    131  HA2 GLY     9       7.265   7.481  -1.455  1.00  0.00 
ATOM    132  C   GLY     9       9.237   7.115  -2.217  1.00  0.00 
ATOM    133  O   GLY     9      10.252   7.230  -1.467  1.00  0.00 
ATOM    134  N   GLY     9       9.145   6.164  -3.161  1.00  0.00 
ATOM    135  H   GLY     9       9.915   5.498  -3.297  1.00  0.00 
ATOM    136  H   GLY     9       8.352   6.115  -3.785  1.00  0.00 
END
